# Supplementary material for: Fresh Food Consumption Increases Microbiome Diversity and Promotes Changes in Bacteria Composition on the Skin of Pet Dogs Compared to Dry Foods
Source: MDPI journal article supplement (doi:10.3390/ani12151881), 2022-07-22
Supplement: s1 [file s1]

**Table S1.** Relative percentages of the most common Phyla and genera of dogs fed FPS and DRY foods.

|                         | Ear   | FPS<br>Groin | Paw   |        | Ear   | DRY<br>Groin | Paw   |
|-------------------------|-------|--------------|-------|--------|-------|--------------|-------|
|                         |       |              |       | Phyla  |       |              |       |
| [Thermi]                | 0.65  | 0.31         | 1.46  |        | 0.24  | 0.85         | 2.69  |
| <i>Acidobacteria</i>    | 0.60  | 0.72         | 3.16  |        | 0.35  | 0.56         | 2.43  |
| <i>Actinobacteria</i>   | 16.14 | 11.65        | 17.62 |        | 21.74 | 18.99        | 18.25 |
| <i>Bacteroidetes</i>    | 16.67 | 15.98        | 13.09 |        | 22.09 | 19.68        | 17.29 |
| <i>Chloroflexi</i>      | 5.07  | 4.43         | 7.19  |        | 1.16  | 3.16         | 3.65  |
| <i>Cyanobacteria</i>    | 3.12  | 1.41         | 4.91  |        | 2.03  | 1.35         | 3.81  |
| <i>Firmicutes</i>       | 19.19 | 31.08        | 9.86  |        | 17.69 | 19.54        | 12.38 |
| <i>Planctomyces</i>     | 3.02  | 5.24         | 9.90  |        | 0.46  | 1.26         | 2.91  |
| <i>Proteobacteria</i>   | 28.00 | 21.03        | 25.79 |        | 24.79 | 28.90        | 29.36 |
| Other                   | 7.54  | 8.15         | 7.02  |        | 9.46  | 5.72         | 7.21  |
|                         |       |              |       | Genera |       |              |       |
| <i>Arthrobacter</i>     | 0.97  | 0.83         | 1.08  |        | 1.24  | 0.91         | 0.86  |
| <i>Capnocytophaga</i>   | 1.24  | 1.44         | 0.05  |        | 0.73  | 2.36         | 0.22  |
| <i>Chryseobacterium</i> | 0.91  | 0.34         | 1.38  |        | 0.71  | 1.87         | 1.10  |
| <i>Conchiformibius</i>  | 3.43  | 2.79         | 0.20  |        | 2.77  | 4.06         | 1.06  |
| <i>Corynebacterium</i>  | 2.12  | 3.51         | 0.33  |        | 3.93  | 1.90         | 2.56  |
| <i>Deinococcus</i>      | 0.63  | 0.31         | 0.98  |        | 0.21  | 0.85         | 1.68  |
| <i>Enhydrobacter</i>    | 0.60  | 0.48         | 2.67  |        | 1.51  | 1.00         | 0.64  |
| <i>Gardnerella</i>      | 1.61  | 0.12         | 0.00  |        | 5.68  | 1.77         | 0.03  |
| <i>Hymenobacter</i>     | 1.22  | 0.45         | 1.40  |        | 0.53  | 1.70         | 1.60  |
| <i>Methylobacterium</i> | 1.44  | 0.25         | 1.77  |        | 1.95  | 0.75         | 1.30  |
| <i>Moraxella</i>        | 1.42  | 1.53         | 0.14  |        | 3.31  | 1.28         | 0.82  |
| <i>Nocardioides</i>     | 1.25  | 0.57         | 1.62  |        | 0.90  | 0.92         | 1.83  |
| <i>Porphyromonas</i>    | 3.40  | 4.78         | 0.58  |        | 7.85  | 3.88         | 4.42  |
| <i>Prevotella</i>       | 0.43  | 1.30         | 0.96  |        | 3.55  | 0.70         | 0.30  |
| <i>Pseudomonas</i>      | 0.90  | 0.13         | 0.54  |        | 0.19  | 2.01         | 3.21  |
| <i>Sphingomonas</i>     | 2.80  | 0.63         | 3.09  |        | 0.58  | 1.31         | 1.39  |
| <i>Staphylococcus</i>   | 10.11 | 22.91        | 5.21  |        | 2.83  | 10.17        | 7.36  |
| <i>Streptococcus</i>    | 2.25  | 5.15         | 0.44  |        | 3.86  | 4.74         | 1.14  |
| <i>Treponema</i>        | 0.93  | 1.59         | 0.11  |        | 0.94  | 0.22         | 0.29  |
| Other                   | 62.33 | 50.88        | 77.43 |        | 56.74 | 57.60        | 68.19 |
